# Supplementary material for: Genetic basis of arsenite and cadmium tolerance in Saccharomyces cerevisiae
Source: PubMed Central journal article supplement (PMC2660369; doi:10.1186/1471-2164-10-105), 2009-03-12
Supplement: 1471-2164-10-105-S2.pdf [file 1471-2164-10-105-S2.pdf]

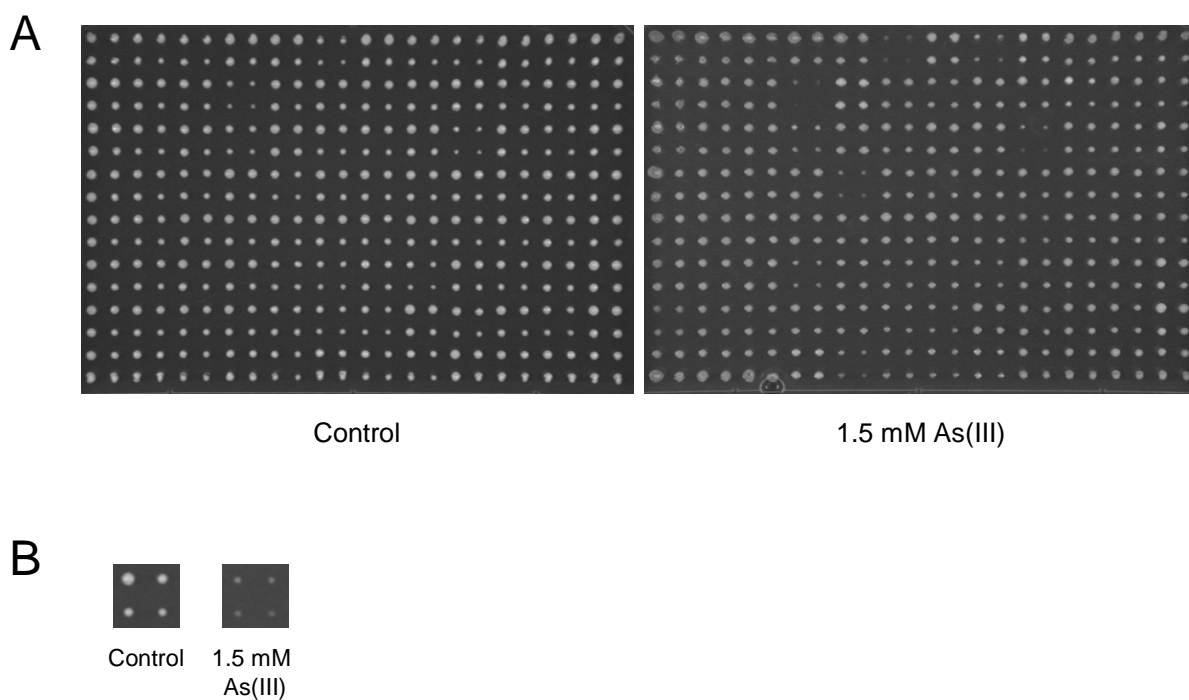

Representative 384-well plate from the primary metal screen. A set of 96 yeast mutants is shown (A), each pinned four times to create a dilution (B) onto solid medium without and with 1.5 mM arsenite. Small colonies represent putative arsenite-sensitive mutants. Plates were photographed after 48h at 30°C.
